# Supplementary material for: Spectroscopic characterization of carbon monoxide activation by neutral chromium carbides
Source: Royal Society of Chemistry journal article supplement (doi:10.1039/d4cp00011k), 2024-01-01
Supplement: d4cp00011k1.pdf [file d4cp00011k1.pdf]

## Electronic Supplementary Information

### **Spectroscopic characterization of carbon monoxide activation by neutral chromium carbides**

Tiantong Wang,<sup>1,2</sup> Zhaoyan Zhang,<sup>1,2</sup> Shuai Jiang,<sup>1,2</sup> Wenhui Yan,<sup>1,2</sup> Shangdong Li,<sup>1,2</sup>  
Jianxing Zhuang,<sup>1,2</sup> Hua Xie,<sup>1</sup> Gang Li,<sup>1,\*</sup> and Ling Jiang<sup>1,3,\*</sup>

1. State Key Laboratory of Molecular Reaction Dynamics, Dalian Institute of Chemical Physics, Chinese Academy of Sciences, Dalian 116023, China.
2. University of Chinese Academy of Sciences, Beijing 100049, China.
3. Hefei National Laboratory, Hefei 230088, China.

\* Corresponding authors.

*E-mail addresses:* gli@dicp.ac.cn (G. Li), ljiang@dicp.ac.cn (L. Jiang).

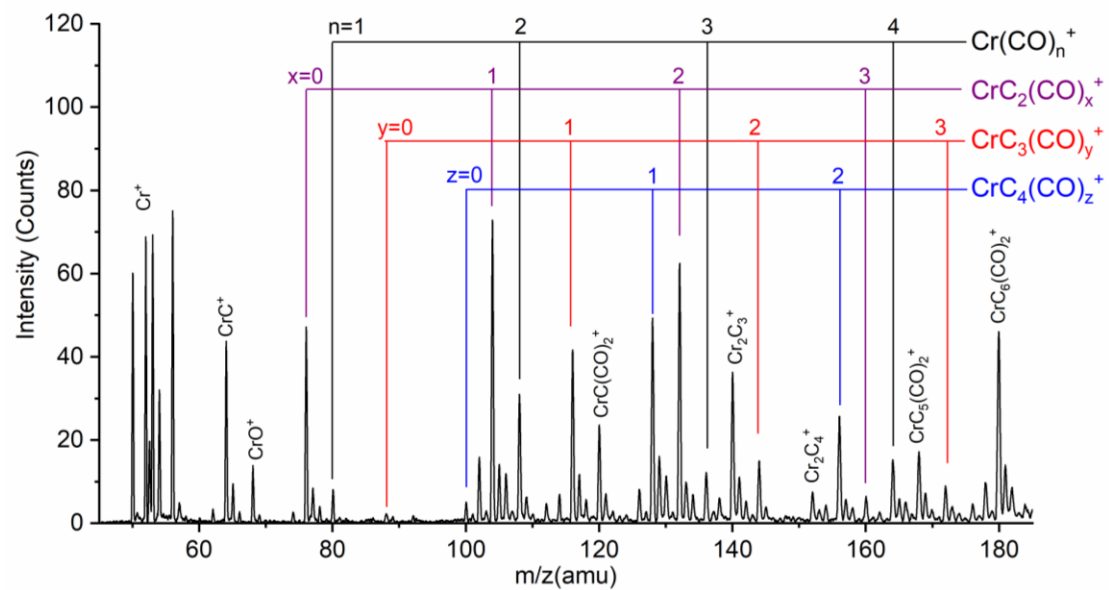

**Figure S1.** Time-of-flight mass spectrum of the species formed by the reaction between CO and chromium metal.

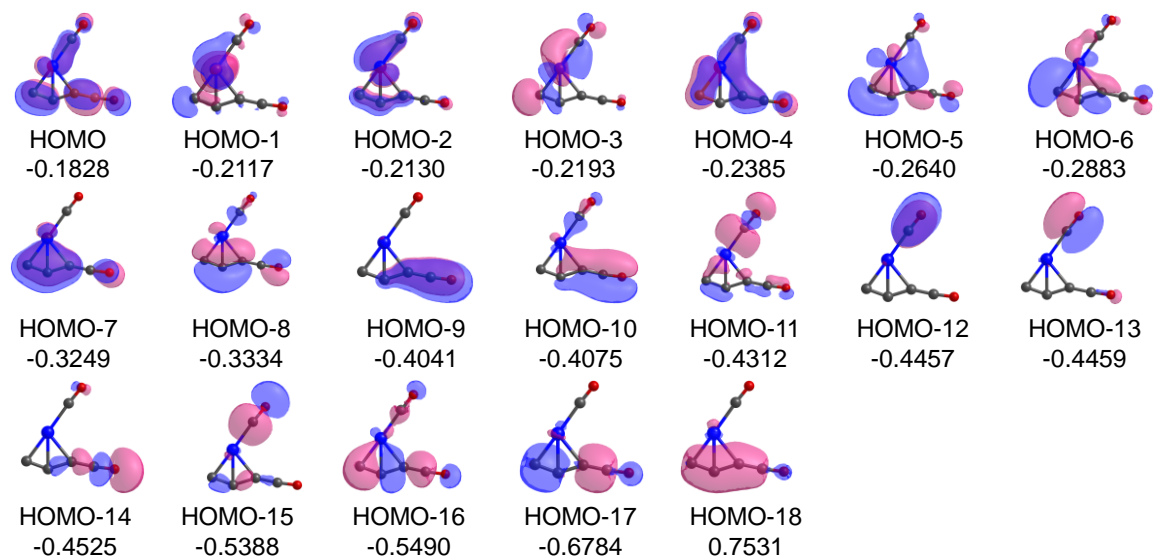

**Figure S2.** Kohn–Sham  $\alpha$ -orbitals of  $\text{CrC}_3(\text{CO})_2\text{-I}$  (3A). The isovalue of the orbital is set to 0.03. Relative energies are listed in Hartree.

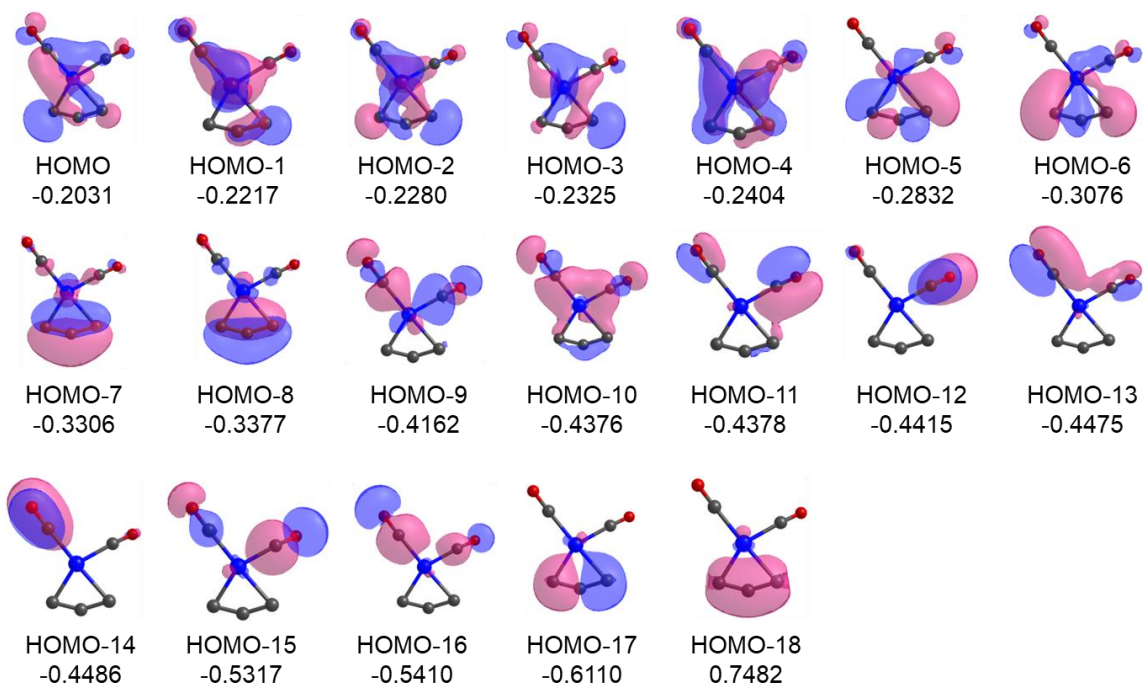

**Figure S3.** Kohn–Sham  $\alpha$ -orbitals of  $\text{CrC}_3(\text{CO})_2\text{-II}$  (3B). The isovalue of the orbital is set to 0.03. Relative energies are listed in Hartree.

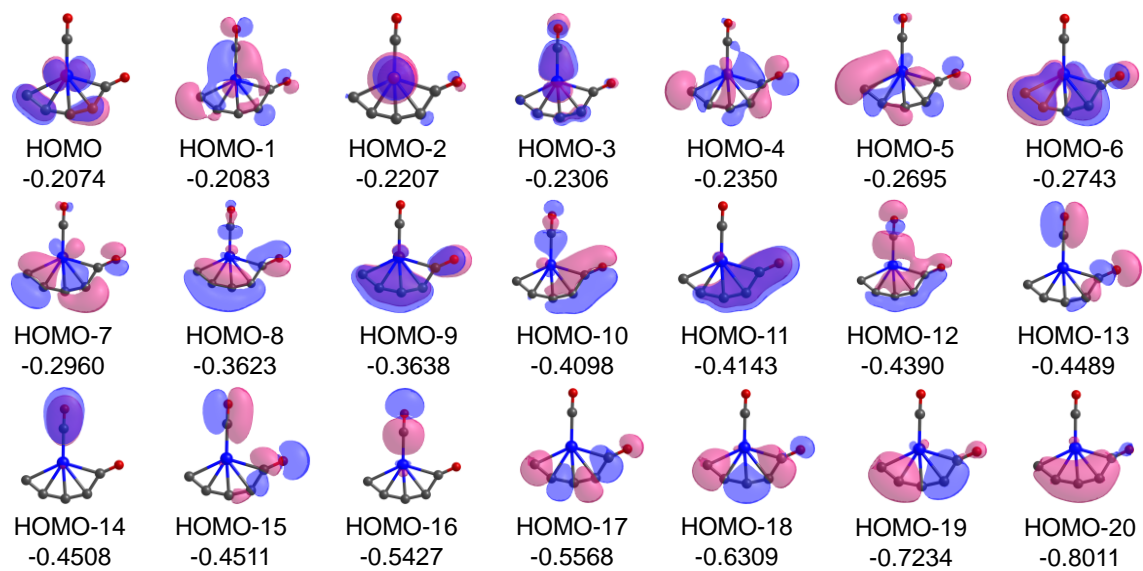

**Figure S4.** Kohn–Sham  $\alpha$ -orbitals of  $\text{CrC}_4(\text{CO})_2\text{-I}$  (4A). The isovalue of the orbital is set to 0.03. Relative energies are listed in Hartree.

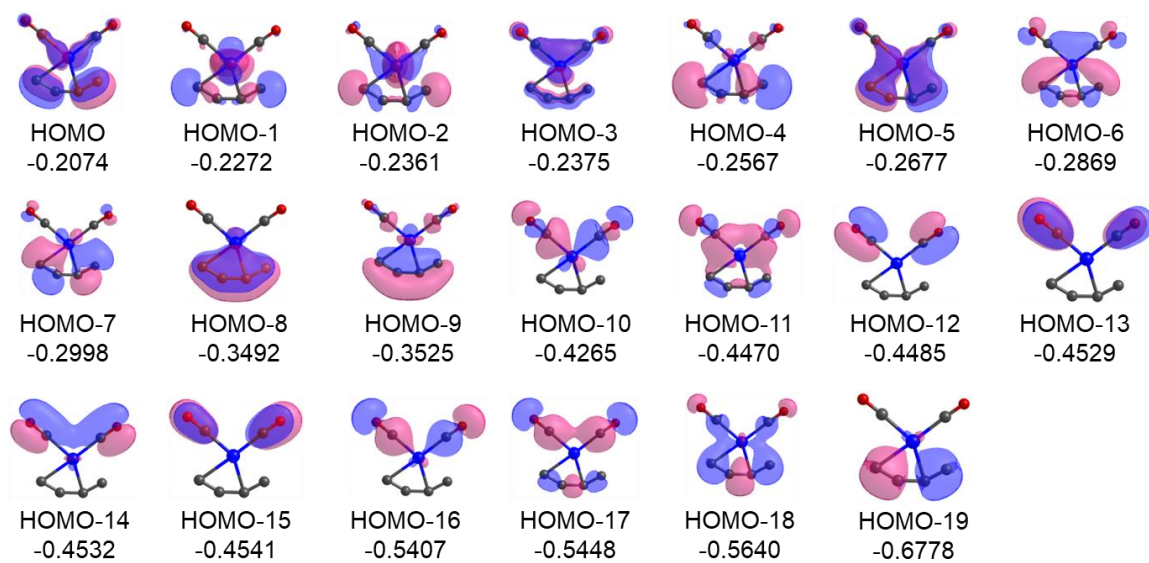

**Figure S5.** Kohn–Sham  $\alpha$ -orbitals of  $\text{CrC}_4(\text{CO})_2\text{-II}$  (4B). The isovalue of the orbital is set to 0.03. Relative energies are listed in Hartree.

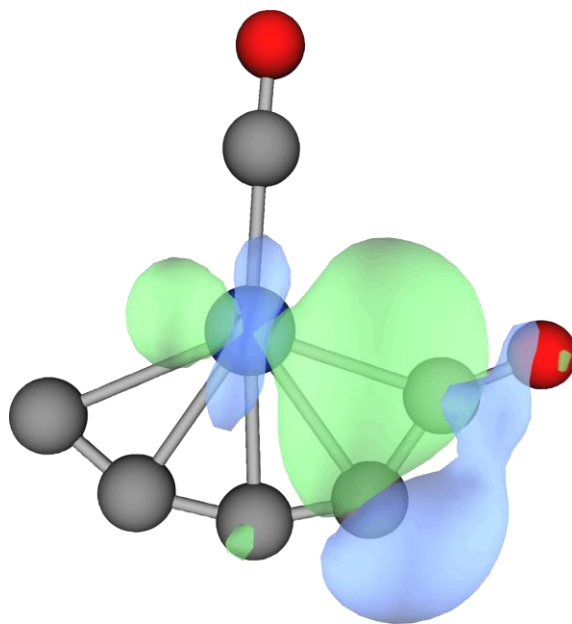

**Figure S6.** The AdNDP bonding analysis of isomer 4A for the 3c-2e bond of interest at the BLYP-D3(BJ) /def2-TZVPP level of theory (O, red; C, gray; Cr, blue). Occupation number (ON) is 1.71 |e| and the isovalue of orbital is set to 0.03.

**Table S1.** Relative energies (kcal/mol) of different isomers of CrC<sub>3</sub> calculated at different methods. The zero-point vibrational corrections are included, except for the CCSD(T)//BLYP-D3(BJ)/def2-TZVPP level of theory.

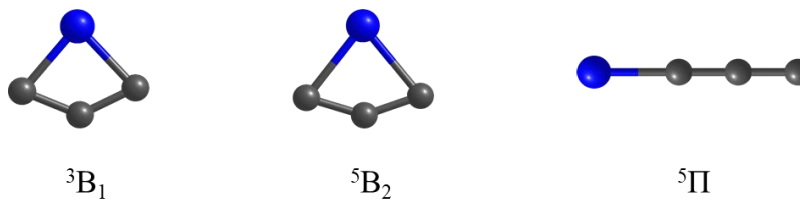

| Method                           | ${}^3B_1$ | ${}^5B_2$ | ${}^5\Pi$ |
|----------------------------------|-----------|-----------|-----------|
| BLYP-D3(BJ)/def2-TZVPP           | 0.0       | 3.6       | 4.7       |
| BPW91/6-311+G(d)                 | 0.0       | 3.5       | 6.9       |
| MN15-L/def2-TZVPP                | 13.3      | 0.0       | 5.8       |
| B2PLYPD3/def2-TZVPP              | 8.6       | 0.0       | 0.7       |
| CCSD(T)//BLYP-D3(BJ) /def2-TZVPP | 10.4      | 0.0       | 8.0       |



Cartesian coordinates of the low-lying isomers, intermediates, and transition states for  $\text{CrC}_3(\text{CO})_2$  and  $\text{CrC}_4(\text{CO})_2$  shown in Figures 3-6 and Figures S2-S6 calculated at the BLYP-D3(BJ)/def2-TZVPP level of theory.

|    |            |            |             |
|----|------------|------------|-------------|
| CO |            |            |             |
| C  | 0.00000000 | 0.00000000 | -0.64953300 |
| O  | 0.00000000 | 0.00000000 | 0.48715000  |

|                  |            |             |             |
|------------------|------------|-------------|-------------|
| CrC <sub>3</sub> |            |             |             |
| Cr               | 0.00000000 | 0.00000000  | 0.74599900  |
| C                | 0.00000000 | 0.00000000  | -1.27606600 |
| C                | 0.00000000 | 1.26191400  | -0.85396500 |
| C                | 0.00000000 | -1.26191400 | -0.85396500 |

|                         |             |             |             |
|-------------------------|-------------|-------------|-------------|
| CrC <sub>3</sub> (CO)-I |             |             |             |
| Cr                      | -1.19915800 | -0.64871200 | 0.00000100  |
| C                       | -0.35830100 | 1.20719700  | 0.00003000  |
| C                       | -1.63965500 | 1.29614900  | -0.00005700 |
| C                       | 1.96380200  | 0.08275200  | -0.00000700 |
| C                       | 0.68848900  | 0.30747200  | 0.00006800  |
| O                       | 3.10672100  | -0.22404300 | -0.00002800 |

|                          |             |             |             |
|--------------------------|-------------|-------------|-------------|
| CrC <sub>3</sub> (CO)-II |             |             |             |
| Cr                       | -0.11113900 | -0.16099100 | -0.00015200 |
| C                        | -1.95297000 | -1.07941000 | 0.00026000  |
| C                        | -1.46980500 | 1.38433600  | 0.00005000  |
| C                        | -2.13763500 | 0.22787200  | 0.00025200  |
| C                        | 1.91929700  | -0.00134600 | -0.00022800 |
| O                        | 3.06425400  | 0.08438500  | 0.00020500  |

|           |             |             |             |
|-----------|-------------|-------------|-------------|
| isomer 3A |             |             |             |
| Cr        | 0.78972000  | -0.72306000 | 0.00011600  |
| C         | -1.10234300 | -1.54186100 | -0.00009800 |
| C         | -0.20513300 | -2.45776500 | -0.00005000 |
| C         | -2.02935000 | 0.86626400  | -0.00007900 |
| C         | -1.26475700 | -0.18082900 | -0.00004800 |
| C         | 1.82679000  | 1.00707600  | -0.00007300 |
| O         | -2.64619800 | 1.87203100  | -0.00000900 |
| O         | 2.35813400  | 2.02748800  | -0.00007900 |

|           |            |             |             |
|-----------|------------|-------------|-------------|
| isomer 3B |            |             |             |
| Cr        | 0.01842400 | -0.26399300 | 0.01670600  |
| C         | 2.19632700 | -0.37095600 | 0.38341900  |
| C         | 0.58303700 | -2.21044200 | -0.30024400 |

|   |             |             |             |
|---|-------------|-------------|-------------|
| C | 1.68045200  | -1.50891000 | -0.05407100 |
| C | 0.51141100  | 1.68931100  | -0.06316600 |
| C | -2.00023100 | -0.15235400 | 0.02164900  |
| O | 0.85987200  | 2.77938000  | -0.12605900 |
| O | -3.14339100 | -0.07238800 | 0.08524900  |

CrC<sub>4</sub>

|    |            |             |             |
|----|------------|-------------|-------------|
| Cr | 0.00000000 | 0.00000000  | 0.80912100  |
| C  | 0.00000000 | 0.69116200  | -1.19873700 |
| C  | 0.00000000 | 1.70214800  | -0.41950400 |
| C  | 0.00000000 | -0.69116200 | -1.19873700 |
| C  | 0.00000000 | -1.70214800 | -0.41950400 |

CrC<sub>4</sub>(CO)-I

|    |             |             |             |
|----|-------------|-------------|-------------|
| Cr | 0.06317100  | -0.42142800 | 0.00011100  |
| C  | 1.42371900  | 1.21742100  | -0.00009800 |
| C  | 1.97751500  | -1.22365400 | -0.00006200 |
| C  | -1.96068900 | -0.18542100 | 0.00001700  |
| C  | 2.13727800  | 0.04237700  | -0.00008300 |
| C  | 0.27951800  | 1.78322700  | -0.00008400 |
| O  | -3.08251800 | 0.03882100  | -0.00010000 |

CrC<sub>4</sub>(CO)-II

|    |             |             |             |
|----|-------------|-------------|-------------|
| Cr | -0.30708700 | -0.77016600 | -0.00012000 |
| C  | -0.54503900 | 1.26743000  | 0.00015100  |
| C  | -1.80705000 | 0.80044100  | 0.00006200  |
| C  | -2.62963000 | -0.18806400 | -0.00006800 |
| C  | 1.67627500  | 0.15207700  | 0.00008100  |
| C  | 0.74531700  | 1.21096100  | 0.00017900  |
| O  | 2.84135600  | -0.12163500 | 0.00005500  |

isomer 4A

|    |             |             |             |
|----|-------------|-------------|-------------|
| Cr | -0.05624600 | -0.38784700 | 0.00007200  |
| C  | 2.00045100  | 0.02674700  | -0.00001200 |
| C  | 1.92058800  | -1.30909700 | -0.00001400 |
| C  | 1.25287600  | -2.41115500 | -0.00007500 |
| C  | 0.28198800  | 1.81296300  | -0.00019500 |
| C  | 1.54904200  | 1.23343300  | -0.00005300 |
| C  | -2.05105600 | -0.61398500 | 0.00010500  |
| O  | -0.35252200 | 2.82319800  | -0.00016100 |
| O  | -3.19415800 | -0.71383700 | 0.00012600  |

isomer 4B

|    |             |            |             |
|----|-------------|------------|-------------|
| Cr | -0.00175700 | 0.08224800 | -0.00009200 |
| C  | -0.65305700 | 2.10190400 | 0.00026600  |
| C  | 1.81295500  | 1.43401200 | -0.00070000 |

|   |             |             |             |
|---|-------------|-------------|-------------|
| C | 1.54837600  | -1.22176100 | 0.00015200  |
| C | -1.58071100 | -1.18689000 | -0.00022400 |
| C | 0.71388100  | 2.08067200  | -0.00035000 |
| C | -1.76956500 | 1.48594000  | 0.00104900  |
| O | 2.45951800  | -1.91210700 | 0.00045200  |
| O | -2.50815700 | -1.85504300 | -0.00032000 |

TS 1

|    |             |             |             |
|----|-------------|-------------|-------------|
| Cr | 0.48043700  | -0.75305500 | -0.07622000 |
| C  | 2.06547900  | 0.46316100  | 0.38721900  |
| C  | -0.25802000 | 1.21045100  | -0.36426000 |
| C  | 1.02567800  | 1.19467600  | -0.00921500 |
| C  | -1.38484300 | -0.05137500 | -0.00174400 |
| O  | -2.52753200 | 0.14648000  | 0.21966100  |

TS2

|    |             |             |             |
|----|-------------|-------------|-------------|
| Cr | 0.18644600  | 0.30446800  | -0.01461700 |
| C  | -0.49223200 | 2.29927000  | 0.02425000  |
| C  | -2.06872900 | 0.24486700  | -0.00671500 |
| C  | -1.51349800 | 1.44513100  | 0.01853900  |
| C  | 2.12686800  | -0.17237200 | 0.00191700  |
| C  | -1.07571300 | -1.25725100 | -0.04380900 |
| O  | 3.23071900  | -0.49527500 | 0.01320400  |
| O  | -1.52257800 | -2.33786400 | 0.03501000  |

TS3

|    |             |             |             |
|----|-------------|-------------|-------------|
| Cr | -0.26266400 | -0.69435700 | 0.00002700  |
| C  | -2.45137400 | -0.45948300 | 0.00000700  |
| C  | -1.88158000 | 0.68382100  | -0.00003700 |
| C  | -0.68077900 | 1.33841200  | -0.00005800 |
| C  | 0.59608800  | 1.44315700  | -0.00005600 |
| C  | 1.67748500  | -0.11262300 | 0.00001200  |
| O  | 2.84311300  | -0.08689200 | 0.00001700  |

TS4

|    |             |             |             |
|----|-------------|-------------|-------------|
| Cr | -0.13312300 | -0.14463900 | 0.00002300  |
| C  | -0.73343500 | -2.30218600 | 0.00002200  |
| C  | 0.53628200  | -2.16102200 | -0.00002100 |
| C  | 1.61425300  | -1.32661700 | -0.00003600 |
| C  | 2.22277000  | -0.20124600 | -0.00001900 |
| C  | 1.06225900  | 1.47876400  | 0.00000700  |
| C  | -2.03916400 | 0.53160900  | -0.00000600 |
| O  | 1.52921400  | 2.53730100  | -0.00000100 |
| O  | -3.12706800 | 0.88214000  | -0.00003000 |
